# Supplementary material for: The Drosophila Duox maturation factor is a key component of a positive feedback loop that sustains regeneration signaling
Source: PubMed Central journal article supplement (PMC5550008; doi:10.1371/journal.pgen.1006937), 2017-07-28
Supplement: pgen.1006937.s010.pdf [file pgen.1006937.s010.pdf]

**Table S2: List of Downregulated genes (log2 fold change  $\leq$  -1.3, p<0.05)**

| #  | gene_id | gene    | locus                | log2(fold change) | p_value    | q_value    |
|----|---------|---------|----------------------|-------------------|------------|------------|
| 1  | Osi1    | Osi1    | 3R:1999366-2000555   | -inf              | 5.0000E-05 | 2.7364E-04 |
| 2  | Obp46a  | Obp46a  | 2R:6198676-6199528   | -6.14             | 2.6500E-03 | 8.9486E-03 |
| 3  | Optix   | Optix   | 2R:3919137-3930041   | -5.96             | 5.0000E-05 | 2.7364E-04 |
| 4  | Hr46    | Hr46    | 2R:6092958-6124853   | -5.52             | 5.0000E-05 | 2.7364E-04 |
| 5  | CG32372 | CG32372 | 3L:7512587-7521116   | -5.40             | 5.0000E-05 | 2.7364E-04 |
| 6  | Tsp42Ei | Tsp42Ei | 2R:2922631-2925174   | -4.92             | 5.0000E-05 | 2.7364E-04 |
| 7  | CG1139  | CG1139  | 3L:1971661-1974285   | -4.73             | 5.0000E-05 | 2.7364E-04 |
| 8  | CG16884 | CG16884 | 2L:13914724-13955757 | -4.64             | 2.0000E-04 | 9.4764E-04 |
| 9  | NetA    | NetA    | X:14498044-14547864  | -4.61             | 5.0000E-05 | 2.7364E-04 |
| 10 | CG42527 | CG42527 | X:1891619-1898128    | -4.58             | 5.0000E-05 | 2.7364E-04 |
| 11 | Poxn    | Poxn    | 2R:11714197-11722280 | -4.53             | 5.0000E-05 | 2.7364E-04 |
| 12 | CG14915 | CG14915 | 2L:11071026-11071532 | -4.44             | 5.0000E-05 | 2.7364E-04 |
| 13 | CG1342  | CG1342  | 3R:26516365-26518490 | -4.36             | 5.0000E-05 | 2.7364E-04 |
| 14 | sm      | sm      | 2R:15417413-15519007 | -4.34             | 5.0000E-05 | 2.7364E-04 |
| 15 | Cpr78E  | Cpr78E  | 3L:21659553-21660080 | -4.19             | 5.0000E-05 | 2.7364E-04 |
| 16 | Lkr     | Lkr     | 3L:5505516-5522441   | -4.14             | 9.0000E-04 | 3.5694E-03 |
| 17 | ImpE2   | ImpE2   | 3L:3510973-3512677   | -3.97             | 5.0000E-05 | 2.7364E-04 |
| 18 | ana     | ana     | 2R:4956605-4965059   | -3.65             | 5.0000E-05 | 2.7364E-04 |
| 19 | Blimp-1 | Blimp-1 | 3L:5624082-5642049   | -3.57             | 5.0000E-05 | 2.7364E-04 |
| 20 | CG8483  | CG8483  | 3R:9034469-9040187   | -3.50             | 5.0000E-05 | 2.7364E-04 |
| 21 | CG10205 | CG10205 | 2R:10720337-10721460 | -3.47             | 2.0000E-04 | 9.4764E-04 |
| 22 | hoe1    | hoe1    | 2L:4908744-4932296   | -3.43             | 5.0000E-05 | 2.7364E-04 |
| 23 | CG16733 | CG16733 | 3R:5077574-5078687   | -3.37             | 5.0000E-05 | 2.7364E-04 |
| 24 | CG16885 | CG16885 | 2L:13914724-13955757 | -3.36             | 5.0000E-05 | 2.7364E-04 |
| 25 | CG13082 | CG13082 | 2L:19538428-19539910 | -3.35             | 5.0000E-05 | 2.7364E-04 |
| 26 | Doc2    | Doc2    | 3L:9005785-9012340   | -3.31             | 5.0000E-05 | 2.7364E-04 |
| 27 | CG8420  | CG8420  | 3R:5073172-5077160   | -3.30             | 5.0000E-05 | 2.7364E-04 |
| 28 | dve     | dve     | 2R:18131467-18173982 | -3.21             | 5.0000E-05 | 2.7364E-04 |
| 29 | CG31975 | CG31975 | 2L:138383-140992     | -3.15             | 5.0000E-05 | 2.7364E-04 |
| 30 | CG4586  | CG4586  | X:6863973-6866302    | -3.11             | 5.0000E-05 | 2.7364E-04 |
| 31 | Doc1    | Doc1    | 3L:9034476-9038144   | -3.00             | 5.0000E-05 | 2.7364E-04 |
| 32 | Wnt2    | Wnt2    | 2R:5381673-5390695   | -2.99             | 5.0000E-05 | 2.7364E-04 |
| 33 | CG7888  | CG7888  | 3L:11047136-11054319 | -2.95             | 3.0000E-04 | 1.3573E-03 |
| 34 | CG3823  | CG3823  | X:6198022-6200778    | -2.90             | 5.0000E-05 | 2.7364E-04 |
| 35 | CG7201  | CG7201  | 3L:8283385-8288422   | -2.88             | 5.0000E-05 | 2.7364E-04 |
| 36 | CG7367  | CG7367  | 2L:8026913-8039788   | -2.85             | 2.0100E-02 | 4.9415E-02 |
| 37 | CG31728 | CG31728 | 2L:13255407-13257426 | -2.82             | 5.0000E-05 | 2.7364E-04 |
| 38 | CG10029 | CG10029 | 3R:3141445-3142929   | -2.75             | 1.5000E-04 | 7.3812E-04 |
| 39 | ImpE3   | ImpE3   | 3R:3839545-3856505   | -2.72             | 5.0000E-05 | 2.7364E-04 |
| 40 | CG30080 | CG30080 | 2R:11586230-11589199 | -2.71             | 5.0000E-05 | 2.7364E-04 |
| 41 | CG15765 | CG15765 | X:5712596-5733606    | -2.66             | 5.0000E-05 | 2.7364E-04 |
| 42 | trh     | trh     | 3L:366523-392633     | -2.58             | 5.0000E-05 | 2.7364E-04 |
| 43 | CR42861 | CR42861 | X:13638960-13639509  | -2.58             | 5.0000E-05 | 2.7364E-04 |
| 44 | Os-C    | Os-C    | 3R:3804680-3806044   | -2.56             | 5.0000E-05 | 2.7364E-04 |
| 45 | CG30380 | CG30380 | 2R:3826705-3827144   | -2.56             | 2.6000E-03 | 8.7988E-03 |
| 46 | spz     | spz     | 3R:22890791-22895790 | -2.51             | 5.0000E-05 | 2.7364E-04 |
| 47 | al      | al      | 2L:378115-387439     | -2.50             | 5.0000E-05 | 2.7364E-04 |
| 48 | CG2930  | CG2930  | X:3766453-3774329    | -2.50             | 5.0000E-05 | 2.7364E-04 |

|    |                        |                        |                      |       |            |            |
|----|------------------------|------------------------|----------------------|-------|------------|------------|
| 49 | spirit                 | spirit                 | X:8465131-8467614    | -2.46 | 5.0000E-05 | 2.7364E-04 |
| 50 | Dhc93AB                | Dhc93AB                | 3R:16850740-16868141 | -2.42 | 5.0000E-05 | 2.7364E-04 |
| 51 | ppk13                  | ppk13                  | 2L:21086899-21088730 | -2.38 | 5.0000E-05 | 2.7364E-04 |
| 52 | Nep1                   | Nep1                   | X:5985802-5998006    | -2.36 | 5.0000E-05 | 2.7364E-04 |
| 53 | CG15546                | CG15546                | 3R:26700086-26701908 | -2.33 | 5.0000E-05 | 2.7364E-04 |
| 54 | CG33509                | CG33509                | 2L:21084604-21086506 | -2.33 | 5.0000E-05 | 2.7364E-04 |
| 55 | RpS19b                 | RpS19b                 | 3R:19758450-19759252 | -2.32 | 5.0000E-05 | 2.7364E-04 |
| 56 | CG14257                | CG14257                | 3R:22901604-22908543 | -2.31 | 5.0000E-05 | 2.7364E-04 |
| 57 | CG10960                | CG10960                | 3L:12817981-12836205 | -2.29 | 5.0000E-05 | 2.7364E-04 |
| 58 | CG9416                 | CG9416                 | 2R:15251149-15260747 | -2.26 | 5.0000E-05 | 2.7364E-04 |
| 59 | CG3568                 | CG3568                 | X:4436662-4438530    | -2.25 | 5.0000E-05 | 2.7364E-04 |
| 60 | CG13081                | CG13081                | 2L:19540692-19541343 | -2.24 | 5.0000E-05 | 2.7364E-04 |
| 61 | CG10026                | CG10026                | 2L:19454255-19457726 | -2.19 | 5.0000E-05 | 2.7364E-04 |
| 62 | Cpr49Ac                | Cpr49Ac                | 2R:8274471-8277562   | -2.19 | 5.0000E-05 | 2.7364E-04 |
| 63 | CG15905                | CG15905                | 2R:15533987-15535150 | -2.18 | 5.0000E-05 | 2.7364E-04 |
| 64 | CG3355                 | CG3355                 | 2L:4651402-4652877   | -2.17 | 5.0000E-05 | 2.7364E-04 |
| 65 | wbl                    | wbl                    | 2R:15137265-15138419 | -2.17 | 5.0000E-05 | 2.7364E-04 |
| 66 | Inos                   | Inos                   | 2R:3342418-3346368   | -2.16 | 5.0000E-05 | 2.7364E-04 |
| 67 | Mur89F                 | Mur89F                 | 3R:12979241-12985670 | -2.15 | 5.0000E-05 | 2.7364E-04 |
| 68 | CG13258                | CG13258                | 2L:16292126-16292970 | -2.15 | 5.0000E-05 | 2.7364E-04 |
| 69 | CG17278                | CG17278                | 3R:16846755-16849885 | -2.12 | 5.0000E-05 | 2.7364E-04 |
| 70 | CG12551                | CG12551                | 2R:1808437-1808752   | -2.11 | 2.9500E-03 | 9.8088E-03 |
| 71 | Cpr97Ea                | Cpr97Ea                | 3R:22908853-22912341 | -2.03 | 6.5000E-04 | 2.6711E-03 |
| 72 | CG5873                 | CG5873                 | 3R:13251493-13272215 | -2.01 | 5.0000E-05 | 2.7364E-04 |
| 73 | snoRNA:Psi2<br>8S-3342 | snoRNA:Psi2<br>8S-3342 | X:5418334-5418498    | -2.00 | 2.0000E-04 | 9.4764E-04 |
| 74 | CG9427                 | CG9427                 | 3R:5450874-5452187   | -1.99 | 5.0000E-05 | 2.7364E-04 |
| 75 | kal-1                  | kal-1                  | 3R:19967116-19974645 | -1.96 | 5.0000E-05 | 2.7364E-04 |
| 76 | CG5697                 | CG5697                 | 3R:16841670-16842842 | -1.95 | 5.0000E-05 | 2.7364E-04 |
| 77 | Eip78C                 | Eip78C                 | 3L:21220018-21257721 | -1.94 | 5.0000E-05 | 2.7364E-04 |
| 78 | Cpr30F                 | Cpr30F                 | 2L:9932586-9933092   | -1.93 | 4.3000E-03 | 1.3516E-02 |
| 79 | CG3649                 | CG3649                 | 2R:18733523-18741220 | -1.93 | 5.0000E-05 | 2.7364E-04 |
| 80 | CG7720                 | CG7720                 | 3R:14584957-14620876 | -1.91 | 5.0000E-05 | 2.7364E-04 |
| 81 | Ugt86Di                | Ugt86Di                | 3R:6977628-6979571   | -1.90 | 5.0000E-05 | 2.7364E-04 |
| 82 | CG6055                 | CG6055                 | 2L:7466545-7472493   | -1.86 | 5.0000E-05 | 2.7364E-04 |
| 83 | CG32706                | CG32706                | X:8981161-8982109    | -1.85 | 5.0000E-05 | 2.7364E-04 |
| 84 | CG32581                | CG32581                | X:15690935-15693189  | -1.84 | 5.0000E-05 | 2.7364E-04 |
| 85 | CG14118                | CG14118                | 3L:12885757-12887858 | -1.84 | 5.0000E-05 | 2.7364E-04 |
| 86 | betaTub97EF            | betaTub97EF            | 3R:23792729-23814089 | -1.78 | 5.0000E-05 | 2.7364E-04 |
| 87 | Lsd-2                  | Lsd-2                  | X:14965488-14970236  | -1.78 | 5.0000E-05 | 2.7364E-04 |
| 88 | Rpt6R                  | Rpt6R                  | 3R:26407919-26409419 | -1.77 | 5.0000E-05 | 2.7364E-04 |
| 89 | t                      | t                      | X:9111687-9117290    | -1.77 | 5.0000E-05 | 2.7364E-04 |
| 90 | CG5639                 | CG5639                 | 3R:23408526-23419260 | -1.76 | 5.0000E-05 | 2.7364E-04 |
| 91 | Fkbp13                 | Fkbp13                 | 2R:17374669-17385431 | -1.76 | 5.0000E-05 | 2.7364E-04 |
| 92 | AnnX                   | AnnX                   | X:20064247-20067552  | -1.75 | 5.0000E-05 | 2.7364E-04 |
| 93 | CG30101                | CG30101                | 2R:13295762-13297705 | -1.75 | 5.0000E-05 | 2.7364E-04 |
| 94 | Gadd45                 | Gadd45                 | 2R:3136667-3138160   | -1.75 | 5.0000E-05 | 2.7364E-04 |
| 95 | CG31559                | CG31559                | 3R:1975837-1982949   | -1.75 | 5.0000E-05 | 2.7364E-04 |
| 96 | CG12918                | CG12918                | 2R:5936984-5939682   | -1.74 | 5.0000E-05 | 2.7364E-04 |
| 97 | CG33169                | CG33169                | 3L:22856963-22857596 | -1.73 | 5.0000E-05 | 2.7364E-04 |
| 98 | CG30195                | CG30195                | 2R:18534117-18534746 | -1.73 | 5.0000E-05 | 2.7364E-04 |
| 99 | CG15362                | CG15362                | 2L:1981309-1981927   | -1.71 | 5.0000E-05 | 2.7364E-04 |

|     |            |            |                      |       |            |            |
|-----|------------|------------|----------------------|-------|------------|------------|
| 100 | CG9186     | CG9186     | 3L:1305274-1313377   | -1.70 | 5.0000E-05 | 2.7364E-04 |
| 101 | pip        | pip        | 3L:19287868-19330699 | -1.70 | 5.0000E-05 | 2.7364E-04 |
| 102 | CG12063    | CG12063    | 3R:27324960-27332716 | -1.68 | 5.0000E-05 | 2.7364E-04 |
| 103 | CG8249     | CG8249     | 2R:11731594-11734865 | -1.67 | 5.0000E-05 | 2.7364E-04 |
| 104 | CG14470    | CG14470    | 2R:1812361-1818868   | -1.67 | 5.0000E-05 | 2.7364E-04 |
| 105 | Trim9      | Trim9      | 2L:10544880-10627374 | -1.67 | 5.0000E-05 | 2.7364E-04 |
| 106 | kn         | kn         | 2R:10660151-10694566 | -1.65 | 5.0000E-05 | 2.7364E-04 |
| 107 | CG6287     | CG6287     | 2L:11151505-11155716 | -1.64 | 5.0000E-05 | 2.7364E-04 |
| 108 | Cpr47Ee    | Cpr47Ee    | 2R:7152630-7154361   | -1.64 | 4.0000E-04 | 1.7372E-03 |
| 109 | Cat        | Cat        | 3L:18815705-18821294 | -1.63 | 5.0000E-05 | 2.7364E-04 |
| 110 | Cpr31A     | Cpr31A     | 2L:10054214-10055935 | -1.62 | 5.0000E-05 | 2.7364E-04 |
| 111 | CG11380    | CG11380    | X:1085443-1090705    | -1.62 | 1.0000E-04 | 5.1606E-04 |
| 112 | dy         | dy         | X:11663805-11672709  | -1.61 | 5.0000E-05 | 2.7364E-04 |
| 113 | Oscillin   | Oscillin   | 2L:5547202-5549614   | -1.61 | 5.0000E-05 | 2.7364E-04 |
| 114 | CG11073    | CG11073    | 2R:17978993-17987231 | -1.61 | 5.0000E-05 | 2.7364E-04 |
| 115 | rdo        | rdo        | 2L:18012406-18070249 | -1.60 | 5.0000E-05 | 2.7364E-04 |
| 116 | CG13114    | CG13114    | 2L:9545810-9547424   | -1.59 | 1.0000E-04 | 5.1606E-04 |
| 117 | CG32572    | CG32572    | X:16608479-16620988  | -1.59 | 1.2000E-03 | 4.5893E-03 |
| 118 | Doc3       | Doc3       | 3L:8998297-9000351   | -1.59 | 5.0000E-05 | 2.7364E-04 |
| 119 | betaTub60D | betaTub60D | 2R:20193404-20200626 | -1.59 | 5.0000E-05 | 2.7364E-04 |
| 120 | CG13737    | CG13737    | 3L:13865828-13895161 | -1.58 | 5.0000E-05 | 2.7364E-04 |
| 121 | Cyp310a1   | Cyp310a1   | 2L:18617256-18661787 | -1.58 | 5.0000E-05 | 2.7364E-04 |
| 122 | SPE        | SPE        | 3R:19511978-19513869 | -1.57 | 5.0000E-05 | 2.7364E-04 |
| 123 | CG42324    | CG42324    | 3L:3485641-3508533   | -1.57 | 5.0000E-05 | 2.7364E-04 |
| 124 | if         | if         | X:16646221-16677467  | -1.57 | 5.0000E-05 | 2.7364E-04 |
| 125 | CG4914     | CG4914     | 3L:14665967-14740971 | -1.56 | 5.0000E-05 | 2.7364E-04 |
| 126 | MESR3      | MESR3      | 2L:18617256-18661787 | -1.55 | 5.0000E-05 | 2.7364E-04 |
| 127 | bip1       | bip1       | 3L:8047432-8051811   | -1.55 | 5.0000E-05 | 2.7364E-04 |
| 128 | CG31051    | CG31051    | 3R:24345269-24346237 | -1.55 | 5.0000E-05 | 2.7364E-04 |
| 129 | Epac       | Epac       | 2R:2649416-2684421   | -1.54 | 5.0000E-05 | 2.7364E-04 |
| 130 | Ppn        | Ppn        | 3R:24346386-24366053 | -1.53 | 5.0000E-05 | 2.7364E-04 |
| 131 | CG11899    | CG11899    | 3R:25026173-25028247 | -1.51 | 5.0000E-05 | 2.7364E-04 |
| 132 | snmRNA:331 | snmRNA:331 | 3R:3300564-3300674   | -1.50 | 3.8500E-03 | 1.2259E-02 |
| 133 | CG14417    | CG14417    | X:2769563-2770556    | -1.50 | 1.5350E-02 | 3.9400E-02 |
| 134 | Calx       | Calx       | 3R:16803997-16840182 | -1.49 | 5.0000E-05 | 2.7364E-04 |
| 135 | Nc         | Nc         | 3L:9961542-9964102   | -1.46 | 5.0000E-05 | 2.7364E-04 |
| 136 | CG8031     | CG8031     | 3R:8824306-8837010   | -1.46 | 5.0000E-05 | 2.7364E-04 |
| 137 | qtc        | qtc        | 2L:5060831-5070750   | -1.46 | 3.5000E-04 | 1.5496E-03 |
| 138 | CG8498     | CG8498     | 2L:8159839-8162389   | -1.45 | 5.0000E-05 | 2.7364E-04 |
| 139 | CG16997    | CG16997    | 2L:12111132-12111995 | -1.45 | 1.3500E-02 | 3.5442E-02 |
| 140 | Pde1c      | Pde1c      | 2L:11814825-11928570 | -1.45 | 5.0000E-05 | 2.7364E-04 |
| 141 | pio        | pio        | 2R:20468771-20485385 | -1.43 | 5.0000E-05 | 2.7364E-04 |
| 142 | CG9363     | CG9363     | 3R:5283368-5286362   | -1.43 | 1.5000E-04 | 7.3812E-04 |
| 143 | CG1273     | CG1273     | 3L:4263720-4277782   | -1.42 | 5.0000E-05 | 2.7364E-04 |
| 144 | nab        | nab        | 3L:4153617-4160932   | -1.42 | 5.0000E-05 | 2.7364E-04 |
| 145 | tey        | tey        | 3L:19643901-19656763 | -1.40 | 5.0000E-05 | 2.7364E-04 |
| 146 | CG7079     | CG7079     | 3R:16873486-16874543 | -1.39 | 2.8500E-03 | 9.5307E-03 |
| 147 | CG10932    | CG10932    | X:7781299-7782785    | -1.38 | 5.0000E-05 | 2.7364E-04 |
| 148 | daw        | daw        | 2L:2805517-2812147   | -1.38 | 5.0000E-05 | 2.7364E-04 |
| 149 | Sec61gamma | Sec61gamma | X:19537364-19538528  | -1.35 | 5.0000E-05 | 2.7364E-04 |
| 150 | Argk       | Argk       | 3L:9041961-9059127   | -1.34 | 5.0000E-05 | 2.7364E-04 |

|     |         |         |                      |          |            |            |
|-----|---------|---------|----------------------|----------|------------|------------|
| 151 | Atox1   | Atox1   | 3L:21634141-21635699 | -1.33    | 5.0000E-05 | 2.7364E-04 |
| 152 | sens    | sens    | 3L:13389328-13394225 | -1.33    | 5.0000E-05 | 2.7364E-04 |
| 153 | Nrt     | Nrt     | 3L:16759173-16772844 | -1.32    | 5.0000E-05 | 2.7364E-04 |
| 154 | CG13023 | CG13023 | 3L:16917437-16920534 | -1.32    | 5.0000E-05 | 2.7364E-04 |
| 155 | Spn43Aa | Spn43Aa | 2R:3035202-3036757   | -1.31    | 5.0000E-05 | 2.7364E-04 |
| 156 | Mmp2    | Mmp2    | 2R:5498643-5571356   | -1.30591 | 5.0000E-05 | 2.7364E-04 |
